# Supplementary material for: Rural-urban differences in prevalence of and risk factors for refractive errors among school children and adolescents aged 6–18 years in Dalian, China
Source: PubMed Central journal article supplement (PMC9465045; doi:10.3389/fpubh.2022.917781), 2022-08-29
Supplement: Data_Sheet_1.pdf [file Data_Sheet_1.pdf]

|                    |                 |        |                 |       |                 |       |   |   |                 |       |                 |       |                 |       |   |   |
|--------------------|-----------------|--------|-----------------|-------|-----------------|-------|---|---|-----------------|-------|-----------------|-------|-----------------|-------|---|---|
| Senior high school | 0.84(0.64,1.11) | 0.221  | 1.00(0.72,1.38) | 0.986 | 1.26(0.82,1.95) | 0.291 | - | - | 1.02(0.81,1.27) | 0.890 | 1.02(0.80,1.30) | 0.883 | 0.84(0.57,1.24) | 0.381 | - | - |
| Bachelor           | 0.64(0.50,0.83) | 0.001  | 0.94(0.70,1.28) | 0.695 | 1.31(0.87,1.96) | 0.190 | - | - | 0.97(0.79,1.19) | 0.748 | 1.11(0.88,1.39) | 0.397 | 0.82(0.57,1.18) | 0.293 | - | - |
| Master             | 0.50(0.35,0.73) | <0.001 | 0.76(0.48,1.19) | 0.231 | 0.73(0.34,1.54) | 0.403 | - | - | 0.71(0.51,0.99) | 0.042 | 0.85(0.59,1.23) | 0.384 | 0.60(0.31,1.17) | 0.131 | - | - |

\* Adjusted with age, gender, and any the variables analysed significantly in the bivariate analysis and potential confounders

**Table S2. Bivariate and multivariate regression results for REs in rural participants.**

|                                   | Myopia                     |                  |                            |                  | Hyperopia              |                  |                        |                  | Astigmatism            |                  |                        |                  | Anisometropia          |                  |                        |                  |
|-----------------------------------|----------------------------|------------------|----------------------------|------------------|------------------------|------------------|------------------------|------------------|------------------------|------------------|------------------------|------------------|------------------------|------------------|------------------------|------------------|
|                                   | bivariate                  |                  | Multivariate*              |                  | bivariate              |                  | Multivariate*          |                  | bivariate              |                  | Multivariate*          |                  | bivariate              |                  | Multivariate*          |                  |
|                                   | OR(95%CI)                  | P                | OR(95%CI)                  | P                | OR(95%CI)              | P                | OR(95%CI)              | P                | OR(95%CI)              | P                | OR(95%CI)              | P                | OR(95%CI)              | P                | OR(95%CI)              | P                |
| Gender                            |                            |                  |                            |                  |                        |                  |                        |                  |                        |                  |                        |                  |                        |                  |                        |                  |
| Male                              | 1                          |                  | 1                          |                  | 1                      |                  | 1                      |                  | 1                      |                  | 1                      |                  | 1                      |                  | 1                      |                  |
| Female                            | 1.20(1.00,1.43)            | 0.045            | 1.16(0.93,1.44)            | 0.197            | 0.99(0.77,1.27)        | 0.919            | 1.07(0.82,1.40)        | 0.623            | 0.89(0.75,1.06)        | 0.200            | 0.84(0.69,1.01)        | 0.101            | 1.27(0.86,1.86)        | 0.230            | 1.28(0.86,1.91)        | 0.226            |
| Age (years)                       |                            |                  |                            |                  |                        |                  |                        |                  |                        |                  |                        |                  |                        |                  |                        |                  |
| 6 - 10                            | 1                          |                  | 1                          |                  | 1                      |                  | 1                      |                  | 1                      |                  | 1                      |                  | 1                      |                  | 1                      |                  |
| 11 - 15                           | <b>6.60(5.36,8.12)</b>     | <b>&lt;0.001</b> | <b>6.39(5.13,7.96)</b>     | <b>&lt;0.001</b> | <b>0.18(0.13,0.25)</b> | <b>&lt;0.001</b> | <b>0.19(0.14,0.26)</b> | <b>&lt;0.001</b> | <b>1.62(1.33,1.97)</b> | <b>&lt;0.001</b> | <b>1.60(1.29,1.97)</b> | <b>&lt;0.001</b> | <b>3.10(1.84,5.22)</b> | <b>&lt;0.001</b> | <b>3.31(1.89,5.80)</b> | <b>&lt;0.001</b> |
| 16 - 18                           | <b>57.60(30.18,109.94)</b> | <b>&lt;0.001</b> | <b>53.84(28.08,103.22)</b> | <b>&lt;0.001</b> | <b>0.11(0.06,0.21)</b> | <b>&lt;0.001</b> | <b>0.12(0.06,0.22)</b> | <b>&lt;0.001</b> | <b>3.96(3.00,5.23)</b> | <b>&lt;0.001</b> | <b>3.83(2.86,5.12)</b> | <b>&lt;0.001</b> | <b>4.89(2.71,8.83)</b> | <b>&lt;0.001</b> | <b>4.82(2.57,9.03)</b> | <b>&lt;0.001</b> |
| Average parental refractive error |                            |                  |                            |                  |                        |                  |                        |                  |                        |                  |                        |                  |                        |                  |                        |                  |
| Without                           | 1                          |                  | 1                          |                  | 1                      |                  | 1                      |                  | 1                      |                  | 1                      |                  | 1                      |                  | 1                      |                  |
| With                              | <b>1.44(1.18,1.74)</b>     | <b>&lt;0.001</b> | <b>1.66(1.30,2.13)</b>     | <b>&lt;0.001</b> | <b>0.75(0.56,0.99)</b> | <b>0.041</b>     | <b>0.68(0.50,0.91)</b> | <b>0.010</b>     | <b>1.43(1.19,1.72)</b> | <b>&lt;0.001</b> | <b>1.31(1.06,1.61)</b> | <b>&lt;0.001</b> | 1.24(0.83,1.85)        | 0.287            | 1.20(0.80,1.81)        | 0.383            |
| Daily hours of near-work          |                            |                  |                            |                  |                        |                  |                        |                  |                        |                  |                        |                  |                        |                  |                        |                  |
| <2h                               | 1                          |                  | 1                          |                  | 1                      |                  | 1                      |                  | 1                      |                  | 1                      |                  | 1                      |                  | 1                      |                  |
| ≥2h                               | <b>5.07(3.48,7.38)</b>     | <b>&lt;0.001</b> | <b>2.34(1.52,3.59)</b>     | <b>&lt;0.001</b> | <b>0.27(0.19,0.40)</b> | <b>&lt;0.001</b> | <b>0.52(0.35,0.78)</b> | <b>0.001</b>     | 1.69(1.17,2.43)        | 0.005            | 1.31(0.86,1.98)        | 0.206            | 2.13(0.77,5.86)        | 0.144            | -                      | -                |
| Daily hours of outdoor activities |                            |                  |                            |                  |                        |                  |                        |                  |                        |                  |                        |                  |                        |                  |                        |                  |
| > 2h                              | 1                          |                  | 1                          |                  | 1                      |                  | 1                      |                  | 1                      |                  | 1                      |                  | 1                      |                  | 1                      |                  |
| ≤ 2h                              | <b>0.82(0.68,1.00)</b>     | <b>0.048</b>     | 0.94(0.75,1.19)            | 0.622            | 1.00(0.76,1.31)        | 0.996            | -                      | -                | 1.19(0.99,1.44)        | 0.070            | -                      | -                | 1.18(0.78,1.76)        | 0.436            | -                      | -                |

|                                |                        |              |                        |              |                 |       |   |   |                        |                  |                        |              |                        |              |                        |              |  |
|--------------------------------|------------------------|--------------|------------------------|--------------|-----------------|-------|---|---|------------------------|------------------|------------------------|--------------|------------------------|--------------|------------------------|--------------|--|
| Annual household income (yuan) |                        |              |                        |              |                 |       |   |   |                        |                  |                        |              |                        |              |                        |              |  |
| >200,000                       | 1                      |              | 1                      |              | 1               |       | 1 |   | 1                      |                  | 1                      |              | 1                      |              | 1                      |              |  |
| ≤ 200,000                      | 0.68(0.45,1.01)        | 0.057        | -                      | -            | 1.19(0.67,2.10) | 0.559 | - | - | <b>0.54(0.37,0.78)</b> | <b>0.001</b>     | <b>0.65(0.44,0.97)</b> | <b>0.035</b> | <b>0.45(0.25,0.83)</b> | <b>0.011</b> | <b>0.53(0.28,0.98)</b> | <b>0.043</b> |  |
| Parental education level       |                        |              |                        |              |                 |       |   |   |                        |                  |                        |              |                        |              |                        |              |  |
| Junior high school             | 1                      |              | 1                      |              | 1               |       | 1 |   | 1                      |                  | 1                      |              | 1                      |              | 1                      |              |  |
| Senior high school             | <b>1.28(1.04,1.58)</b> | <b>0.022</b> | <b>1.52(1.17,1.97)</b> | <b>0.002</b> | 1.20(0.90,1.62) | 0.220 | - | - | <b>1.42(1.15,1.74)</b> | <b>0.001</b>     | <b>1.35(1.08,1.68)</b> | <b>0.009</b> | 1.42(0.90,2.23)        | 0.128        | -                      | -            |  |
| Bachelor                       | 1.15(0.90,1.47)        | 0.275        | 1.15(0.84,1.56)        | 0.377        | 1.09(0.77,1.56) | 0.623 | - | - | <b>1.58(1.24,2.02)</b> | <b>&lt;0.001</b> | <b>1.49(1.14,1.95)</b> | <b>0.004</b> | 1.64(0.99,2.73)        | 0.054        | -                      | -            |  |
| Master                         | 0.66(0.27,1.59)        | 0.349        | 0.59(0.20,1.75)        | 0.341        | 1.77(0.58,5.37) | 0.316 | - | - | 1.15(0.47,2.85)        | 0.755            | 1.14(0.44,2.97)        | 0.782        | -                      | -            | -                      | -            |  |

\*Adjusted with age, gender, and any the variables analysed significantly in the bivariate analysi
